# Supplementary material for: Smart Skin Patterns Protect Springtails
Source: PubMed Central journal article supplement (PMC3184130; doi:10.1371/journal.pone.0025105), 2011-09-30
Supplement: pone.0025105.s005.pdf [file pone.0025105.s005.pdf]

| orders (4)       | families (16)     | species also analyzed by TEM                              | main comb alignment                         | side length of primary granules [nm] | comb diameter [nm] | secondary granules | secondary granule distance [nm] | secondary granule height [nm] |
|------------------|-------------------|-----------------------------------------------------------|---------------------------------------------|--------------------------------------|--------------------|--------------------|---------------------------------|-------------------------------|
|                  |                   | species                                                   |                                             |                                      |                    |                    |                                 |                               |
| Entomobryomorpha | Entomobryidae     | <i>Entomobrya corticalis</i> (Nicolet, 1842)              | hexagonal                                   | 210                                  | 1200               | no                 |                                 |                               |
|                  | Entomobryidae     | <i>Entomobrya muscorum</i> (Nicolet, 1842)                | hexagonal                                   | 180                                  | 670                | no                 |                                 |                               |
|                  | Entomobryidae     | <i>Sinella tenbricosa</i> (Folsom, 1902)                  | hexagonal                                   | 200                                  | 1200               | no                 |                                 |                               |
|                  | Entomobryidae     | <i>Lepidocyrtus paradoxus</i> (Uzel, 1890)                | hexagonal                                   | 190                                  | 790                | no                 |                                 |                               |
|                  | Entomobryidae     | <i>Orchesella flavescens</i> (Bourlet, 1839)              | hexagonal                                   | 330                                  | 1600               | no                 |                                 |                               |
|                  | Entomobryidae     | <i>Seira domestica</i> (Nicolet, 1842)                    | hexagonal                                   | 190                                  | 720                | no                 |                                 |                               |
|                  | Tomoceridae       | <i>Pogonognathellus flavescens</i> (Tullberg, 1871)       | hexagonal                                   | 220                                  | 1000               | no                 |                                 |                               |
|                  | Tomoceridae       | <i>Tomocerus minor</i> (Lubbock, 1862)                    | hexagonal                                   | 180                                  | 870                | no                 |                                 |                               |
|                  | Oncopoduridae     | <i>Oncopodura crassicornis</i> (Shoebbotham, 1911)        | hexagonal                                   | 160                                  | 620                | no                 |                                 |                               |
|                  | Isotomidae        | <i>Hydroisotoma schaefferi</i> (Krausbauer, 1898)         | hexagonal                                   | 170                                  | 620                | no                 |                                 |                               |
|                  | Isotomidae        | <i>Desoria violacea</i> (Tullberg, 1876)                  | rhombic                                     | 210                                  | 570                | no                 |                                 |                               |
|                  | Isotomidae        | <i>Folsomia candida</i> (Willem, 1902)                    | rhombic                                     | 190                                  | 440                | no                 |                                 |                               |
|                  | Isotomidae        | <i>Folsomia quadrioculata</i> (Tullberg, 1871)            | rhombic                                     | 180                                  | 570                | no                 |                                 |                               |
|                  | Isotomidae        | <i>Anurophorus coiffaiti</i> (Cassagnau & Delamare, 1955) | rhombic                                     | 320                                  | 700                | no                 |                                 |                               |
| Poduromorpha     | Onychiuridae      | <i>Supraphorura furcifera</i> (Börner, 1901)              | hexagonal & rhombic                         | 200                                  | 570                | yes                | 2900                            | 890                           |
|                  | Onychiuridae      | <i>Orthonychiurus stachianus</i> (Bagnall, 1939)          | hexagonal & rhombic                         | 190                                  | 550                | yes                | 4700                            | 1800                          |
|                  | Onychiuridae      | <i>Kalaphorura heterodoxa</i> (Gisin, 1964)               | irregular                                   | 270                                  | 580                | yes                | 7500                            | 5000                          |
|                  | Onychiuridae      | <i>Tetrodontophora bielanensis</i> (Waga 1842)            | rhombic                                     | 300                                  | 610                | yes                | 5100                            | 3800                          |
|                  | Tullbergiidae     | <i>Stenaphorura quadrispina</i> (Börner, 1901)            | hexagonal                                   | 200                                  | 590                | yes                | 2800                            | 990                           |
|                  | Tullbergiidae     | <i>Mesaphorura macrochaeta</i> (Rusek, 1976)              | hexagonal                                   | 180                                  | 600                | yes                | 1400                            | 570                           |
|                  | Tullbergiidae     | <i>Tullbergia callipygos</i> (Börner, 1902)               | hexagonal                                   | 240                                  | 830                | yes                | 3100                            | 710                           |
|                  | Neanuridae        | <i>Neanura muscorum</i> (Templeton, 1836)                 | hexagonal                                   | 270                                  | 780                | yes                | 6400                            | 4500                          |
|                  | Neanuridae        | <i>Friesa mirabilis</i> (Tullberg, 1871)                  | hexagonal                                   | 230                                  | 650                | yes                | 2200                            | 1500                          |
|                  | Hypogastruridae   | <i>Ceratophysella denticulata</i> (Bagnall, 1941)         | hexagonal                                   | 260                                  | 810                | yes                | 4300                            | 1200                          |
|                  | Hypogastruridae   | <i>Ceratophysella scotica</i> (Carpenter & Evans 1899)    | hexagonal                                   | 280                                  | 760                | yes                | 3800                            | 3000                          |
|                  | Brachystomellidae | <i>Brachystomella parvula</i> (Schäffer, 1896)            | hexagonal                                   | 200                                  | 620                | yes                | 2200                            | 1800                          |
|                  | Poduridae         | <i>Podura aquatica</i> (Linneus, 1758)                    | rhombic                                     | 220                                  | 470                | yes                | 2200                            | 1400                          |
|                  | Symphypleona      | Bourletiellidae                                           | <i>Borletiella hortensis</i> (Fritch, 1863) | hexagonal & rhombic                  | 350                | 1200               | no                              |                               |
| Bourletiellidae  |                   | <i>Heterosminthurus insignis</i> (Reuter, 1876)           | hexagonal                                   | 220                                  | 990                | no                 |                                 |                               |
| Sminthuridae     |                   | <i>Allacma fusca</i> (Linnaeus, 1758)                     | irregular spikes                            |                                      |                    | no                 |                                 |                               |
| Sminthuridae     |                   | <i>Lipothrix lubbocki</i> (Tullberg, 1872)                | rhombic                                     | 290                                  | 730                | yes                | 2700                            | 1500                          |
| Dicyrtomidae     |                   | <i>Dicyrtomina ornata</i> (Nicolet, 1842)                 | hexagonal & rhombic                         | 260                                  | 1000               | yes                | 1500                            | 1200                          |
| Arrhopalitidae   |                   | <i>Arrhopalites pygmaeus</i> (Wantzel, 1860)              | hexagonal & rhombic                         | 190                                  | 620                | yes                | 1500                            | 540                           |
| Katiannidae      |                   | <i>Sminthurinus aureus</i> (Lubbock, 1962)                | hexagonal & rhombic                         | 240                                  | 870                | yes                | 1600                            | 550                           |
| Neelipleona      | Neelidae          | <i>Megalothorax minimus</i> (Willem, 1900)                | hexagonal                                   | 160                                  | 380                | yes                | 950                             | 300                           |
