# Supplementary material for: Smart Skin Patterns Protect Springtails
Source: PubMed Central journal article supplement (PMC3184130; doi:10.1371/journal.pone.0025105), 2011-09-30
Supplement: pone.0025105.s006.pdf [file pone.0025105.s006.pdf]

| Dropping height:                   | 1 cm                 |                                 | 3 cm                 |                                 | 15 cm                |                                 |
|------------------------------------|----------------------|---------------------------------|----------------------|---------------------------------|----------------------|---------------------------------|
|                                    | visible destructions | loss of antiwetting performance | visible destructions | loss of antiwetting performance | visible destructions | loss of antiwetting performance |
| <b>plants</b>                      |                      |                                 |                      |                                 |                      |                                 |
| <i>Euphorbia tubifera</i>          | +                    | -                               | +                    | +                               | +                    | +                               |
| <i>Limnocharis flava</i>           | +                    | +                               | +                    | +                               | +                    | +                               |
| <i>Nelumbo nucifera</i>            | +                    | +                               | +                    | +                               | +                    | +                               |
| <i>Xanthosoma violaceum</i>        | +                    | +                               | +                    | +                               | +                    | +                               |
| <b>springtail</b>                  |                      |                                 |                      |                                 |                      |                                 |
| <i>Tetrodontophora bielanensis</i> | -                    | -                               | -                    | -                               | +                    | partial                         |
